# Supplementary material for: Efficacy, Safety, and Tolerability of Approved Combination BRAF and MEK Inhibitor Regimens for BRAF-Mutant Melanoma
Source: PubMed Central journal article supplement (PMC6895913; doi:10.3390/cancers11111642), 2019-10-24
Supplement: cancers-11-01642-s001.pdf [file cancers-11-01642-s001.pdf]

# Supplementary Materials: Efficacy, Safety, and Tolerability of Approved Combination BRAF and MEK Inhibitor Regimens for *BRAF*-Mutant Melanoma

Omid Hamid, C. Lance Cowey, Michelle Offner, Mark Faries and Richard D. Carvajal

**Table S1.** Anticancer Treatment by Regimen Following Study Drug Discontinuation.

|                                         | Dabrafenib + Trametinib<br>[1,2] |                           | Vemurafenib +<br>Cobimetinib [3] | Encorafenib +<br>Binimetinib [4] |
|-----------------------------------------|----------------------------------|---------------------------|----------------------------------|----------------------------------|
|                                         | COMBI-v †<br><i>n</i> = 352      | COMBI-d<br><i>n</i> = 209 | coBRIM<br><i>n</i> = 183         | COLUMBUS<br><i>n</i> = 192       |
| Any treatment                           | 72 (20%)                         | 101 (48%)                 | 105 (57%)                        | 80 (42%)                         |
| Immunotherapy                           | NR                               | 117 (56%)                 | 67 (37%)                         | NR                               |
| Any anti-PD-1/anti-PD-L1                | NR                               | NR                        | 28 (15%)                         | 39 (20%)                         |
| Ipilimumab (anti-CTLA-4)                | 41 (12%)                         | 86 (41%)                  | 53 (29%)                         | 33 (17%)                         |
| Nivolumab (anti-PD-1)                   | NR                               | 15 (7%)                   | NR                               | NR                               |
| Pembrolizumab (anti-PD-L1)              | 4 (1%)                           | 27 (13%)                  | NR                               | NR                               |
| anti-CTLA-4 +<br>anti-PD-1/anti-PD-L1 ‡ | NR                               | NR                        | 4 (2%)                           | 6 (3%)                           |
| Targeted therapies                      | NR                               | 21 (10%) §                | 32 (18%)                         | NR                               |
| BRAFi + MEKi                            | NR                               | NR                        | 15 (8%)                          | 10 (5%) ¶                        |
| BRAFi                                   | NR                               | NR                        | 19 (10%)                         | 11 (6%) #                        |
| MEKi                                    | NR                               | NR                        | 2 (1%)                           | NR                               |
| Chemotherapy                            | NR                               | 37 (18%)                  | 30 (16%)                         | 14 (7%) **                       |
| Other                                   | NR                               | NR                        | 2 (1%) ††                        | 5 (3%) ††                        |

NR = not reported. Data are *n* (%). PD-1 = programmed death cell receptor 1. PD-L1 = programmed death cell ligand 1. † Multiple uses of a type of therapy for an individual patient were only counted once in the frequency for that treatment category; patients might have received multiple lines of treatment. Received by ≥2% of patients. ‡ Ipilimumab + nivolumab or ipilimumab + pembrolizumab. § Small-molecule targeted therapy. ¶ Dabrafenib + trametinib; dabrafenib + cobimetinib + trametinib; encorafenib + binimetinib; vemurafenib + cobimetinib; vemurafenib + protein kinase inhibitors. # Dabrafenib or vemurafenib. \*\* Abemaciclib; bleomycin; bleomycin + dacarbazine + lomustine + vincristine sulfate; carboplatin + dacarbazine + vinblastine sulfate; carboplatin + paclitaxel; carmustine + cisplatin + dacarbazine; carmustine + dacarbazine + hydroxycarbamide; cisplatin + dacarbazine; cisplatin + dacarbazine + vinblastine/vinblastine sulfate; cisplatin + temozolomide; cisplatin + vinblastine sulfate; dacarbazine; fotemustine; gemcitabine + treosulfan + trofosfamide; melphalan + norflox-tz; temozolomide; vinblastine sulfate. †† Other immunotherapy agents included granulocyte colony-stimulating factor and adoptive immunotherapy. †† Antineoplastic and immunomodulating agents; antineoplastic and immunomodulating agents + monoclonal antibodies; bevacizumab; bevacizumab + ipilimumab + nivolumab; binimetinib + buparlisib + encorafenib; binimetinib + capmatinib + encorafenib; binimetinib + encorafenib + ribociclib; dabrafenib + pembrolizumab; dabrafenib + pembrolizumab + trametinib; interferon; investigational drug; investigational drug + pembrolizumab; ipilimumab + vemurafenib; monoclonal antibodies; paclitaxel; radiotherapy; talimogene laherparepvec.

**Table S2.** Adverse Events in ≥20% of Patients in Any Combination Treatment Arm [5–7].

| Adverse Event, <i>n</i> , (%) * | COMBI-v        |                | coBRIM         |                | COLUMBUS       |                |
|---------------------------------|----------------|----------------|----------------|----------------|----------------|----------------|
|                                 | D/T            | V              | V/C            | V              | E/B            | V              |
|                                 | <i>n</i> = 350 | <i>n</i> = 349 | <i>n</i> = 247 | <i>n</i> = 246 | <i>n</i> = 192 | <i>n</i> = 186 |
| Diarrhea                        | 112 (32)       | 131 (38)       | 148 (60)       | 76 (31)        | 70 (36)        | 63 (34)        |
| Arthralgia                      | 84 (24)        | 178 (51)       | 89 (36)        | 99 (40)        | 49 (26)        | 83 (45)        |
| Nausea                          | 121 (35)       | 125 (36)       | 102 (41)       | 62 (25)        | 79 (41)        | 63 (34)        |
| Fatigue                         | 101 (29)       | 115 (33)       | 85 (34)        | 80 (33)        | 55 (29)        | 57 (31)        |
| Rash                            | 76 (22)        | 149 (43)       | 98 (40)        | 94 (38)        | 27 (14)        | 54 (29)        |
| Pyrexia                         | 184 (53)       | 73 (21)        | 69 (28)        | 56 (23)        | 35 (18)        | 52 (28)        |
| Vomiting                        | 101 (29)       | 53 (15)        | 60 (24)        | 31 (13)        | 57 (30)        | 28 (15)        |
| Headache                        | 101 (29)       | 77 (22)        | 41 (17)        | 39 (16)        | 42 (22)        | 35 (19)        |
| Photosensitivity reaction       | 13 (4)         | 78 (22)        | 82 (33)        | 45 (18)        | 8 (4)          | 45 (24)        |
| Hypertension                    | 92 (26)        | 84 (24)        | 37 (15)        | 19 (8)         | 21 (11)        | 21 (11)        |
| Increased ALT                   | 48 (14)        | 61 (17)        | 61 (25)        | 44 (18)        | 21 (11)        | 14 (8)         |
| Constipation                    | 48 (14)        | 61 (17)        | 24 (10)        | 26 (11)        | 42 (22)        | 12 (6)         |
| Increased AST                   | 40 (11)        | 45 (13)        | 58 (23)        | 31 (13)        | 16 (8)         | 4 (2)          |
| Cough                           | 69 (20)        | 34 (10)        | 19 (8)         | 30 (12)        | 16 (8)         | 13 (7)         |
| Increased blood CK              | 7 (2)          | 1 (<1)         | 80 (32)        | 7 (3)          | 44 (23)        | 4 (2)          |
| Chills                          | 110 (31)       | 27 (8)         | NR             | NR             | 9 (5)          | 10 (5)         |

AE = adverse event; ALT = alanine transaminase; AST = aspartate transaminase; CK = creatinine phosphokinase; D/T = dabrafenib plus trametinib; E/B = encorafenib plus binimetinib; NR = not reported; V = vemurafenib, V/C = vemurafenib plus cobimetinib. \* Events are presented in descending order of overall incidence in the combination arms.

**Table S3.** Grade 3/4 Adverse Events Reported in ≥5% of Patients in Any Combination Treatment Arm [5–7].

| Adverse event, % * | COMBI-v        |                | coBRIM <sup>†</sup> |                | COLUMBUS       |                |
|--------------------|----------------|----------------|---------------------|----------------|----------------|----------------|
|                    | D/T            | V              | V/C                 | V              | E/B            | V              |
|                    | <i>n</i> = 350 | <i>n</i> = 349 | <i>n</i> = 247      | <i>n</i> = 246 | <i>n</i> = 192 | <i>n</i> = 186 |
| Increased GGT      | 4              | 5              | 13                  | 10             | 9              | 3              |
| Hypertension       | 14             | 9              | 5                   | 2              | 6              | 3              |
| Increased ALT      | 3              | 4              | 11                  | 6              | 5              | 2              |
| Rash               | 1              | 9              | 5                   | 6              | 1              | 3              |
| Rash maculopapular | <1             | 4              | 7                   | 5              | 0              | 4              |
| Increased blood CK | 1              | <1             | 11                  | 0              | 7              | 0              |
| Increased AST      | 1              | 3              | 9                   | 2              | 2              | 2              |
| Diarrhea           | 1              | <1             | 7                   | <1             | 3              | 2              |
| Neutropenia        | 5              | 1              | –                   | –              | 1              | 1              |
| Nausea             | <1             | <1             | –                   | –              | 2              | 2              |
| Vomiting           | 1              | <1             | –                   | –              | 2              | 1              |

AE = adverse event; ALT = alanine transaminase; AST = aspartate transaminase; CK = creatinine phosphokinase; D/T = dabrafenib plus trametinib; E/B = encorafenib plus binimetinib; GGT = gamma-glutamyl transferase; V = vemurafenib; V/C = vemurafenib plus cobimetinib.\* Events are presented in descending order of overall incidence in the combination arms.† Data for neutropenia, nausea, vomiting were not available.

**Table S4.** Scientific Literature Search Criteria.

- Literature Databases
  - National Library of Medicine
  - EMBase
  - OVID
  - BIOSIS
- Search Terms
  - Clinical Trial
    - Clinical Trial; Clinical Trial, Phase II; Clinical Trial, Phase III; Clinical Trial, Phase IV; Comparative Study; Controlled Clinical Trial; Multicenter Study; Observational Study; Randomized Controlled Trial
- MeSH Headings
  - Melanomas
  - Malignant Melanoma
  - Malignant Melanomas
  - Melanoma, Malignant
  - Melanomas, Malignant
- Boolean Terms
  - BRAF-mutant Malignant Melanoma
  - BRAF-mutant
  - Combination Treatment
  - BRAF Inhibitor
  - MEK Inhibitor
  - BRAF / MEK Inhibitor
  - BRAF and MEK Inhibitor
- Search Type
  - Boolean-based AND / OR analysis
- Study Population(s)
  - All
- Age
  - All
- Study Ethnicity
  - All
- Species
  - Human
- Language(s)
  - English
- Publication Types
  - All
- Journal Categories
  - All
- Timeframe
  - January 1, 2000 to December 1, 2018
- Exclusions
  - Clinical Trial
    - Clinical Trial, Phase I; Pre-clinical
  - Publication Types
    - Literature Review; Case Studies; Secondary Analysis;
  - Search terms
    - None
  - Population
    - None

**Table S5.** Data Sources and Cutoff Dates for COMBI-v, coBRIM and COLUMBUS Trials.

|                                                | COMBI-v                               |             | coBRIM                                           |                       | COLUMBUS                                |             |
|------------------------------------------------|---------------------------------------|-------------|--------------------------------------------------|-----------------------|-----------------------------------------|-------------|
|                                                | Source                                | Data Cutoff | Source                                           | Data Cutoff           | Source                                  | Data Cutoff |
| Baseline characteristics                       | Robert et al. primary publication [2] | 17 Apr 2014 | Larkin et al. primary publication [8]            | 9 May 2014            | Dummer et al. primary publication [5]   | 19 May 2016 |
| PFS, OS, ORR, DOR,                             | U.S. dabrafenib label (6/2017) [9]    | 17 Apr 2014 | Efficacy<br>U.S. cobimetinib label (5/2016) [10] | 16 Jan 2015 [7]       | Dummer et al. primary publication [5]   | 19 May 2016 |
|                                                | Robert et al. primary publication [2] |             | EPAR [7]                                         |                       |                                         |             |
|                                                | Robert et al. 2015 [11]               | 13 Mar 2015 | Ascierto et al. 2016 [3]                         | 28 Aug 2015           | Dummer OS [4]                           | 07 Nov 2017 |
| Safety                                         |                                       |             |                                                  |                       |                                         |             |
| Safety summary, most common AEs, Grade 3/4 AEs | Robert et al. primary publication [2] | 17 Apr 2014 | Larkin et al. primary publication [8]            | 19 Sept 2014 (update) | Dummer et al. primary publication [5]   | 19 May 2016 |
| Most common AEs, Grade 3/4 AEs                 |                                       |             |                                                  |                       |                                         |             |
| ADRs *                                         | dabrafenib/trametinib                 |             | vemurafenib/cobimetinib                          |                       | encorafenib/binimetinib                 |             |
|                                                | U.S. trametinib label (6/2017) [12]   | 12 Jan 2015 | U.S. cobimetinib label (5/2016) [10]             | 19 Sep 2014 (update)  | U.S. encorafenib label (6/2018) [13,14] | 19 May 2016 |

ADR = adverse drug reaction; AE = adverse events; DOR = duration of response; EPAR = European public assessment report; NA = not applicable; ORR = objective response rate; OS = overall survival; LDH = lactate dehydrogenase; PFS = progression-free survival. \* Main sources of data; other sources noted in Table 8.

## Reference

- Long, G.V.; Flaherty, K.T.; Stroyakovskiy, D.; Gogas, H.; Levchenko, E.; de Braud, F.; Larkin, J.; Garbe, C.; Jouary, T.; Hauschild, A., et al. Dabrafenib plus trametinib versus dabrafenib monotherapy in patients with metastatic BRAF V600E/K-mutant melanoma: long-term survival and safety analysis of a phase 3 study. *Ann. Oncol.* **2017**, *28*, 1631–1639, doi:10.1093/annonc/mdx176.
- Robert, C.; Karaszewska, B.; Schachter, J.; Rutkowski, P.; Mackiewicz, A.; Stroiakovski, D.; Lichinitser, M.; Dummer, R.; Grange, F.; Mortier, L., et al. Improved overall survival in melanoma with combined dabrafenib and trametinib. *N. Engl. J. Med.* **2015**, *372*, 30–39, doi:10.1056/NEJMoa1412690.
- Ascierto, P.A.; McArthur, G.A.; Dreno, B.; Atkinson, V.; Liskay, G.; Di Giacomo, A.M.; Mandalà, M.; Demidov, L.; Stroyakovskiy, D.; Thomas, L., et al. Cobimetinib combined with vemurafenib in advanced BRAF(V600)-mutant melanoma (coBRIM): updated efficacy results from a randomised, double-blind, phase 3 trial. *Lancet Oncol.* **2016**, *17*, 1248–1260, doi:10.1016/s1470-2045(16)30122-x.
- Dummer, R.; Ascierto, P.A.; Gogas, H.J.; Arance, A.; Mandalà, M.; Liskay, G.; Garbe, C.; Schadendorf, D.; Krajsova, I.; Gutzmer, R., et al. Overall survival in patients with BRAF-mutant melanoma receiving encorafenib plus binimetinib versus vemurafenib or encorafenib (COLUMBUS): a multicentre, open-label, randomised, phase 3 trial. *Lancet Oncol.* **2018**, *19*, 1315–1327, doi:10.1016/s1470-2045(18)30497-2.
- Dummer, R.; Ascierto, P.A.; Gogas, H.J.; Arance, A.; Mandalà, M.; Liskay, G.; Garbe, C.; Schadendorf, D.; Krajsova, I.; Gutzmer, R., et al. Encorafenib plus binimetinib versus vemurafenib or encorafenib in patients with BRAF-mutant melanoma (COLUMBUS): a multicentre, open-label, randomised phase 3 trial. *Lancet Oncol.* **2018**, *19*, 603–615, doi:10.1016/s1470-2045(18)30142-6.
- European Medicines Agency Public Assessment Report. Mekinist (Trametinib) and Tafinlar (Dabrafenib) EMEA/H/C/WS/0736. Available online: [https://www.ema.europa.eu/documents/variation-report/mekinist-epar-assessment-report-variation\\_en.pdf](https://www.ema.europa.eu/documents/variation-report/mekinist-epar-assessment-report-variation_en.pdf) (accessed on 11 January 2019).
- European Medicines Agency Public Assessment Report. Cotellic EMA/685908/2015. Available online: [https://www.ema.europa.eu/documents/assessment-report/cotellic-epar-public-assessment-report\\_en.pdf](https://www.ema.europa.eu/documents/assessment-report/cotellic-epar-public-assessment-report_en.pdf) (accessed on 20 December 2018).

8. Larkin, J.; Ascierto, P.A.; Dreno, B.; Atkinson, V.; Liskay, G.; Maio, M.; Mandala, M.; Demidov, L.; Stroyakovskiy, D.; Thomas, L., et al. Combined vemurafenib and cobimetinib in BRAF-mutated melanoma. *N. Engl. J. Med.* **2014**, *371*, 1867-1876, doi:10.1056/NEJMoa1408868.
9. Novartis Pharmaceuticals Corporation. *Tafinlar [package insert]*; Novartis Pharmaceuticals Corporation: East Hanover, NJ, USA, 2018.
10. Genentech USA Inc. *Cotellic [Package Insert]*; Genentech USA Inc.: South San Francisco, CA, USA, 2018.
11. Robert, C.; Karaszewska, B.; Schachter, J.; Rutkowski, P.; Mackiewicz, A.; Stroyakovskiy, D.; Lichinitser, M.; Dummer, R.; Grange, F.; Mortier, L., et al. 3301 Two year estimate of overall survival in COMBI-v, a randomized, open-label, phase III study comparing the combination of dabrafenib (D) and trametinib (T) with vemurafenib (Vem) as first-line therapy in patients (pts) with unresectable or metastatic BRAF V600E/K mutation-positive cutaneous melanoma. *Eur. J. Cancer* **2015**, *51*, S663, doi:10.1016/S0959-8049(16)31820-2.
12. Novartis Pharmaceuticals. *Mekinist [package insert]*; Novartis Pharmaceuticals: East Hanover, NJ, USA, 2018.
13. Array BioPharma Inc. *Braftovi [package insert]*; Array BioPharma Inc.: Boulder, CO, USA, 2018.
14. Array BioPharma Inc. *Mektovi [package insert]*; Array BioPharma Inc.: Boulder, CO, USA, 2018.

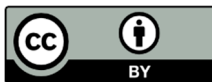

© 2019 by the authors. Licensee MDPI, Basel, Switzerland. This article is an open access article distributed under the terms and conditions of the Creative Commons Attribution (CC BY) license (<http://creativecommons.org/licenses/by/4.0/>).
